# Supplementary material
Source: PubMed Central journal article supplement (PMC3831032)
Supplement: mt2013149x1.pdf [file mt2013149x1.pdf]

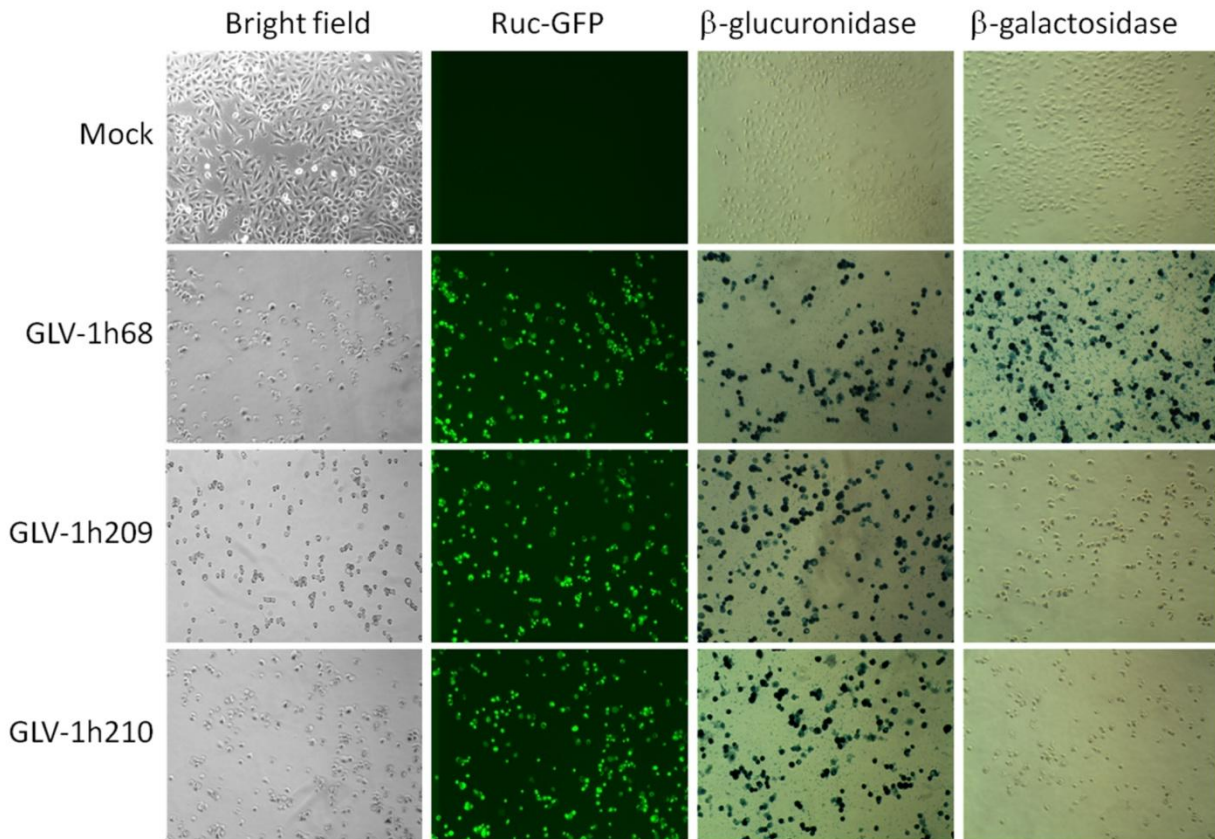

**Supplementary Figure S1. Expression of marker genes from EPO-VACVs detected by fluorescence microscopy and X-gal, X-GlcA staining.** A549 cells in 24-well plates were mock infected or infected with GLV-1h68, GLV-1h209 or GLV-1h210 at an MOI of 1. At 24 hpi, cells were pictured for the GFP signal under the fluorescence microscope, and stained with 5-bromo-4-chloro-3-indolyl-b-D-galactopyranoside (X-gal) and 5-bromo-4-chloro-3-indolyl-b-D-glucuronic acid (X-GlcA) for detection of  $\beta$ -galactosidase and  $\beta$ -glucuronidase, respectively.

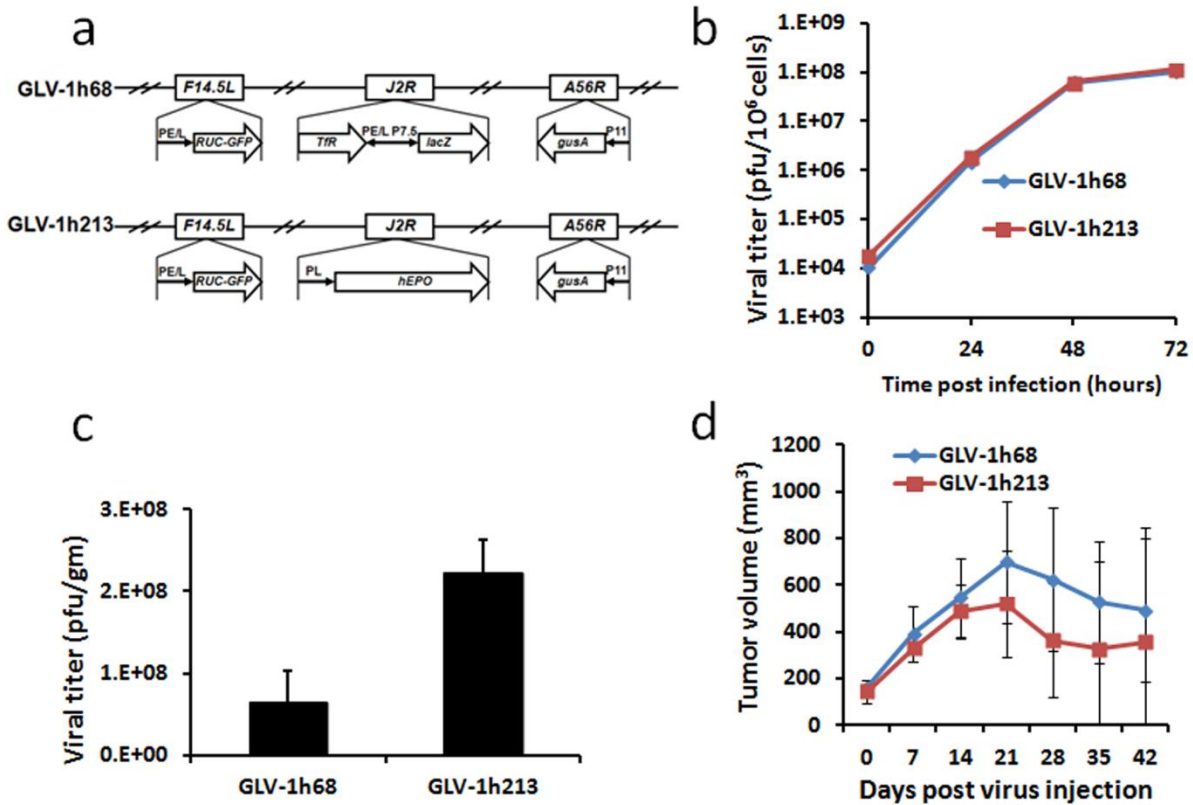

**Supplementary Figure S2.** Virally expressed hEPO enhances virus replication in tumors, resulting accelerated tumor regression. **(a)** Schematic representation of GLV-1h68 and GLV-1h213 constructs. GLV-1h213 was derived from the parental virus GLV-1h68. The  $\beta$ -galactosidase expression cassette in GLV-1h68 was replaced with the hEPO expression cassette under the control of the vaccinia synthetic late promoter PL to yield GLV-1h213. Ruc-GFP is the *Renilla* luciferase-Aequorea GFP fusion protein. PE/L, P11, and P7.5 are VACV synthetic early/late, 11-K late, and 7.5-K early/late promoters, respectively. TfR is the human transferrin receptor inserted in the reverse orientation with respect to the promoter PE/L. **(b)** Virus replication curves. A549 cells in 6-well plates were infected with GLV-1h68 or GLV-1h210 at an MOI of 0.01 in triplicate. Cells and supernatants were collected at 24, 48, and 72 hpi for virus titration using plaque assays in CV-1 cells. GLV-1h213 and GLV-1h68 showed almost identical replication efficiency in A549 cells. **(c)** Viral titers in tumors at 14 dpi. 5-6 week-old-male athymic nude mice were implanted s.c. with  $5 \times 10^6$  A549 cells on the right hind flank. About 3 weeks later, tumor-bearing mice were r.o. injected with a single dose of 2

$\times 10^6$  pfu/mouse of each virus. Tumors were excised at 14 days post virus injection. Viral titers were determined by plaque assays on CV-1 cells. Data is presented as average values of 4 individual samples per gram with tissue standard deviations. The GLV-1h213 titer in tumors was 3.5 times as high as the GLV-1h68 titer. The difference was statistically significant ( $p=0.0014$ ). Consistently, GLV-1h213-treated tumors showed accelerated regression compared with tumors treated with GLV-1h68 (**d**).

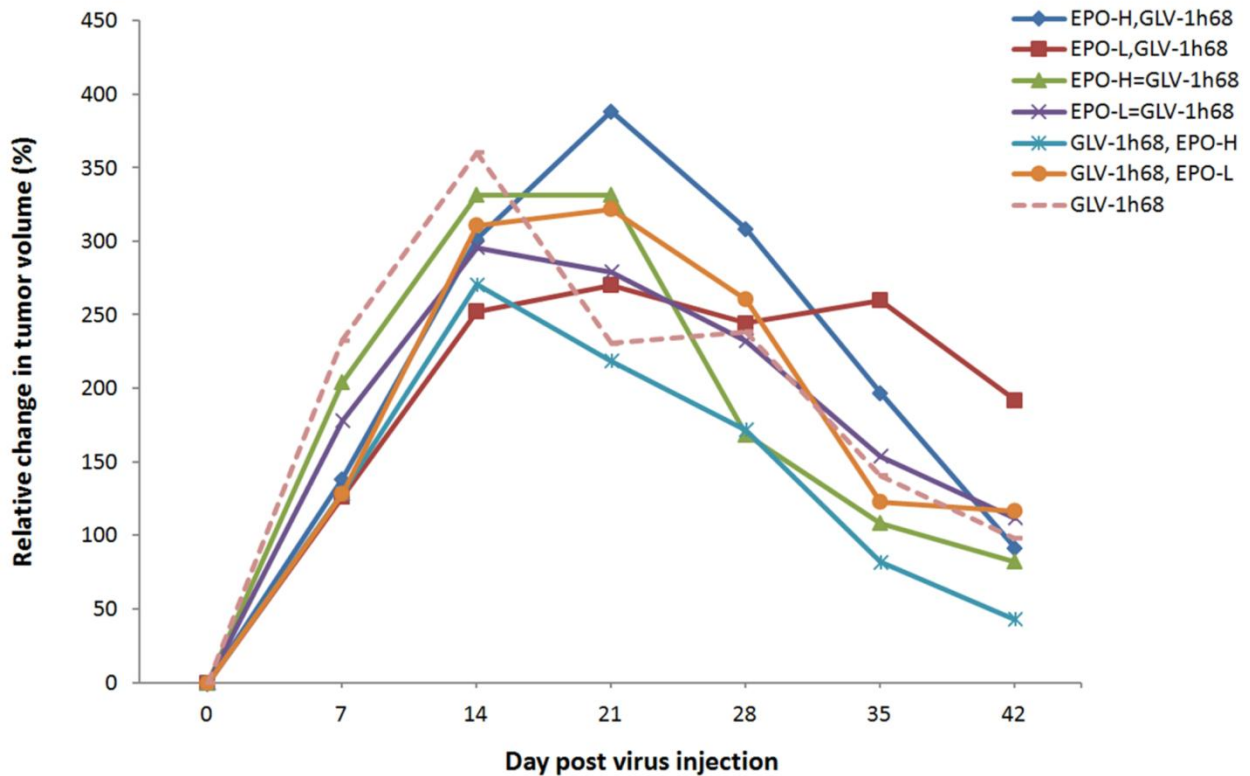

**Supplementary Figure S3. Relative changes in tumor volume after treatment with GLV-1h68 in combination with rhEPO (Epoetin alfa).** Tumor-bearing mice were injected r.o. with a single dose of  $2 \times 10^6$  pfu of GLV-1h68 or GLV-1h68 combined with different rhEPO doses given at different times. 1000 U/kg (EPO-H) and 100 U/kg (EPO-L) were injected s.c. 1 week before, at the same time, or 1 week after GLV-1h68 administration. Data shows relative changes in median tumor volume ( $n=6$ ). No statistically significant differences among groups were found.

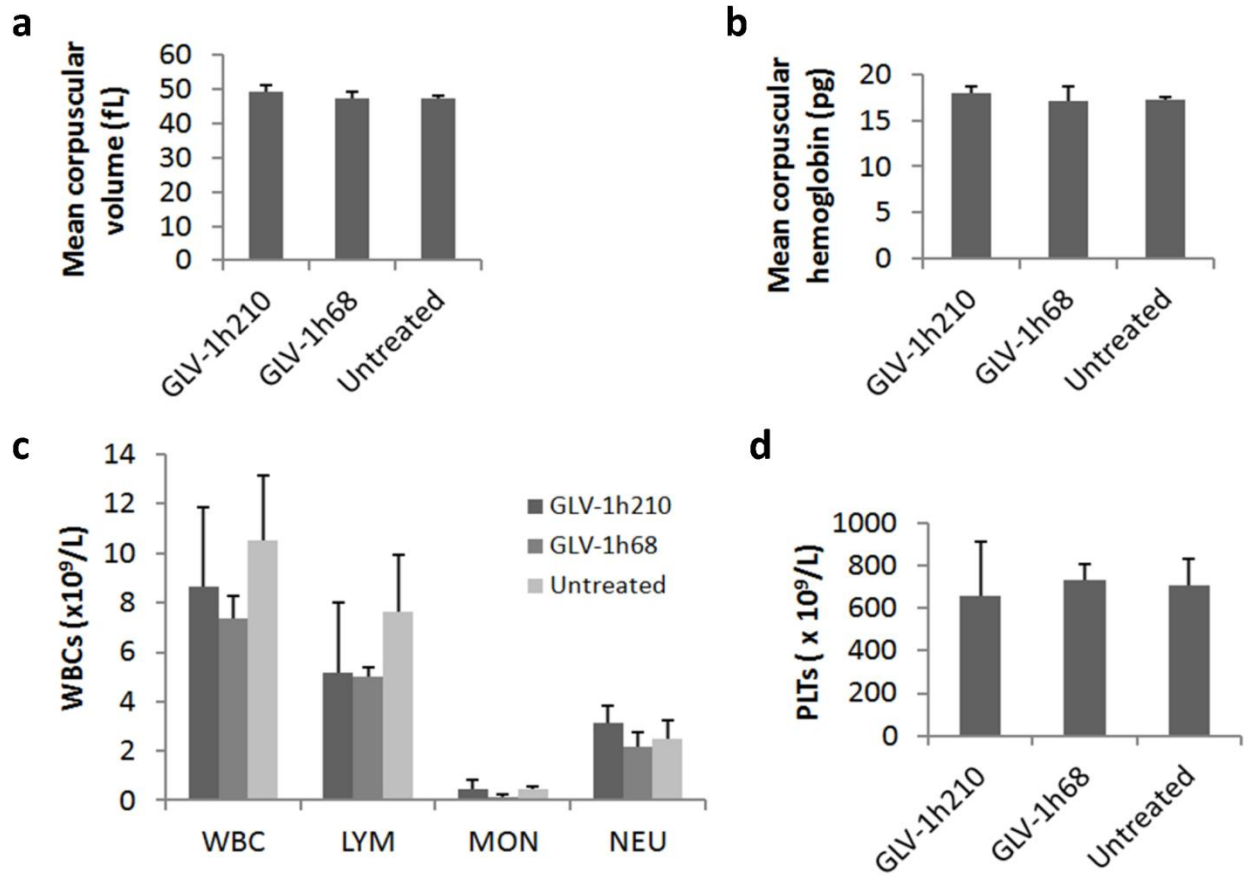

**Supplementary Figure S4. The effects of virally expressed hEPO on blood cell populations.** Tumor-bearing mice were injected r.o. with a single dose of  $2 \times 10^6$  pfu of GLV-1h210 or GLV-1h68. At 14 dpi, Mice were euthanized by CO<sub>2</sub> inhalation and 0.1 mL of whole blood was taken r.o. from each mouse for blood testing. **(a)** Mean corpuscular volume, **(b)** Mean corpuscular hemoglobin, **(c)** White blood cell populations (WBC); lymphocytes (LYM), monocytes (MON), neutrophils (NEU), and **(d)** Platelets (PLT) are shown as average values with SD.

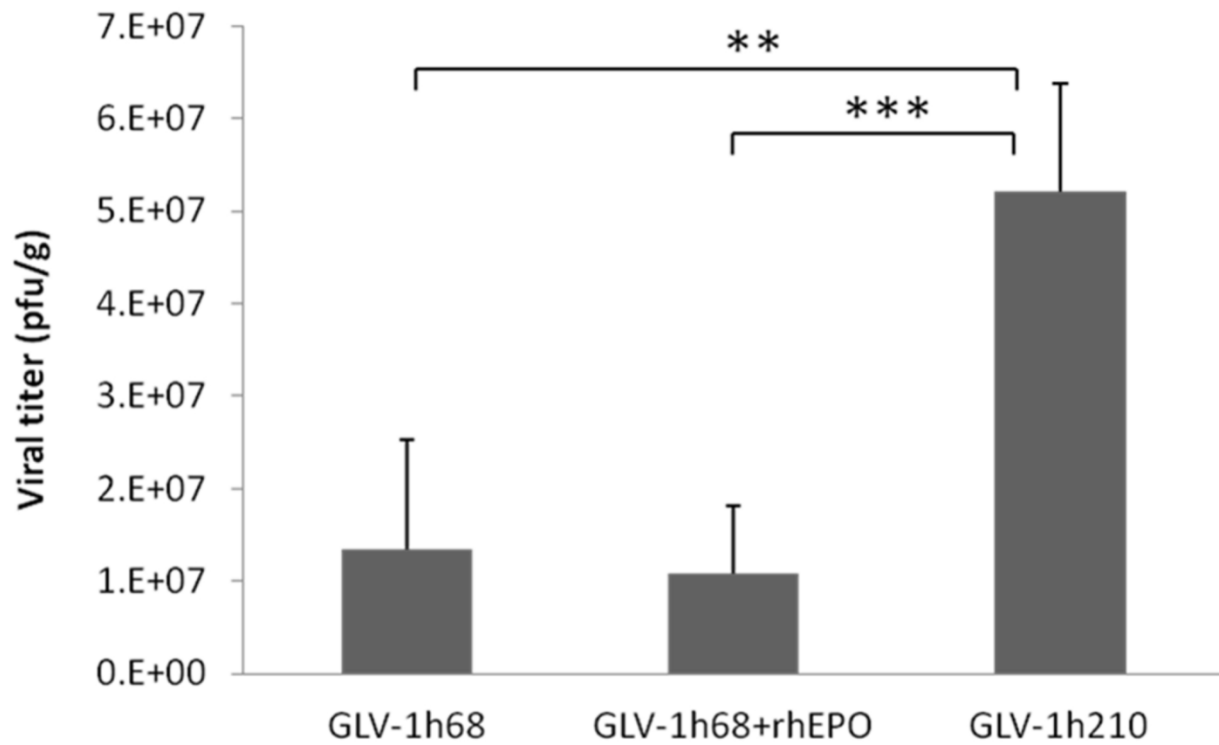

**Supplementary Figure S5. Virus titer after treatment with GLV-1h68, GLV-1h210 and GLV-1h68 in combination with rhEPO.** Mice were injected with  $2 \times 10^6$  pfu of GLV-1h68 or GLV-1h210. Concomitantly, 500 U/kg rhEPO was injected s.c. for 9 consecutive days post virus injection (Day 1-9) into the GLV-1h68+rhEPO group. Four mice were killed at 14 dpi for virus titration in tumors.

**Supplementary Table S1. Virus distribution in organs after treatment with GLV-1h68, GLV-1h209, and GLV-1h210.**

Organs from tumor-bearing mice treated with the indicated viruses, were excised at 14 days post virus injection. Tissues were homogenized, frozen/thawed, sonicated. Virus particles were determined by plaque assays on CV-1 cells. Data is presented as average values of 4-5 individual samples per gram tissue or per milliliter (serum) with standard deviation (SD). n.d stands for non-detectable, \* indicates p = 0.016 when compared to GLV-1h68.

| Virus            | Viral titer (pfu/g)<br>(numbers of animal detected virus/total tested animal) |          |              |     |             |    |         |    |         |    |             |    |             |    |         |    |
|------------------|-------------------------------------------------------------------------------|----------|--------------|-----|-------------|----|---------|----|---------|----|-------------|----|-------------|----|---------|----|
|                  | Tumor                                                                         |          | Lung         |     | Spleen      |    | Brain   |    | Liver   |    | Kidney      |    | Heart       |    | Serum   |    |
|                  | Average                                                                       | SD       | Average      | SD  | Average     | SD | Average | SD | Average | SD | Average     | SD | Average     | SD | Average | SD |
| <b>GLV-1h68</b>  | <b>2.73E+06<br/>(4/4)</b>                                                     | 3.16E+06 | 110<br>(2/4) | 165 | n.d         |    | n.d     |    | n.d     |    | 26<br>(1/4) | 52 | 48<br>(2/4) | 56 | n.d     |    |
| <b>GLV-1h209</b> | <b>1.25E+07<br/>(4/4)</b>                                                     | 1.01E+07 | 21<br>(1/4)  | 46  | n.d         |    | n.d     |    | n.d     |    | n.d         |    | n.d         |    | n.d     |    |
| <b>GLV-1h210</b> | <b>2.34E+07 *<br/>(5/5)</b>                                                   | 1.48E+07 | 126<br>(2/5) | 237 | 32<br>(1/5) | 72 | n.d     |    | n.d     |    | 36<br>(1/5) | 80 | n.d         |    | n.d     |    |

**Supplementary Table S2. Hemoglobin levels return to normalcy in mice treated with GLV-1h210 after tumor eradication.** Tumor-bearing mice were injected r.o. with a single dose of  $2 \times 10^6$  pfu of GLV-1h210. Tumor volumes, GFP signal and Hb levels measured at day 40 and 90 post virus injection are displayed for individual mice. Mice with tumor volumes  $<50 \text{ mm}^3$  are considered tumor eradicated (grey shading).

| Mouse ID | 40 dpi    |     |                                 | 90 dpi    |     |                                 |
|----------|-----------|-----|---------------------------------|-----------|-----|---------------------------------|
|          | Hb (g/dL) | GFP | Tumor volume (mm <sup>3</sup> ) | Hb (g/dL) | GFP | Tumor volume (mm <sup>3</sup> ) |
| 14854    | 21.89     | +   | 224.16                          | 12.59     | -   | 30.70                           |
| 14855    | 22.61     | ++  | 204.52                          | 24.44     | -   | 106.50                          |
| 14856    | 22.41     | +++ | 737.18                          | 23.53     | +   | 259.36                          |
| 14827    | 21.92     | ++  | 176.65                          | 15.78     | -   | 0.00                            |
| 14828    | 24.10     | ++  | 321.30                          | 25.27     | +++ | 321.77                          |
| 14829    | 23.96     | +++ | 206.43                          | 25.13     | +   | 175.59                          |

**Supplementary Table S3. Comparison of mouse immune-related antigens in tumors after treatment with GLV-1h210, GLV-1h209 or GLV-1h68.** Displayed are the fold differences in mouse immune antigens expressed in tumors at 14 days post treatment with  $2 \times 10^6$  pfu of GLV-1h210, GLV-1h209 or GLV-1h68. Equal amounts of protein from 4 tumors in each group were pooled into 1 representative sample and examined for 58 immune-related antigens (RodentMAP, Mariad RBM, Austin, TX, USA).

|    | Antigen                                                   | Units | LDD   | GLV-1h210/<br>GLV-1h209 ratio | GLV-1h210/<br>GLV-1h68 ratio | GLV-1h209/<br>GLV-1h68 ratio |
|----|-----------------------------------------------------------|-------|-------|-------------------------------|------------------------------|------------------------------|
| 1  | Apolipoprotein A-I (Apo A-I)                              | ug/mL | 0.24  | 0.8                           | 1.3                          | 1.7                          |
| 2  | C-Reactive Protein Mouse (CRP Mouse)                      | ug/mL | 0.023 | 1.2                           | 1.0                          | 0.9                          |
| 3  | CD40 (CD40)                                               | pg/mL | 4.5   | 0.6                           | 1.8                          | 3.3                          |
| 4  | CD40 Ligand (CD40-L)                                      | pg/mL | 414   | 0.8                           | 0.8                          | 1.0                          |
| 5  | Endothelin-1 (ET-1)                                       | pg/mL | 36    | 2.0                           | 1.1                          | 0.6                          |
| 6  | Eotaxin                                                   | pg/mL | 5.0   | 0.8                           | 1.3                          | 1.6                          |
| 7  | Epidermal Growth Factor Mouse (EGF Mouse)                 | pg/mL | 9.3   | 1.0                           | 0.9                          | 0.9                          |
| 8  | Factor VII                                                | ng/mL | 28    | 1.3                           | 1.0                          | 0.8                          |
| 9  | Fibrinogen                                                | ug/mL | 7.7   | 0.6                           | 0.7                          | 1.2                          |
| 10 | Fibroblast Growth Factor 9 (FGF-9)                        | ng/mL | 2.1   | 1.0                           | 0.9                          | 0.9                          |
| 11 | Fibroblast Growth Factor basic (FGF-basic)                | ng/mL | 23    | 1.0                           | 0.8                          | 0.8                          |
| 12 | Granulocyte Chemotactic Protein-2 Mouse (GCP-2 Mouse)     | ng/mL | 0.019 | 1.0                           | 1.8                          | 1.8                          |
| 13 | Granulocyte-Macrophage Colony-Stimulating Factor (GM-CSF) | pg/mL | 4.2   | 1.2                           | <LOW>                        | <LOW>                        |
| 14 | Growth-Regulated Alpha Protein (KC/GRO)                   | ng/mL | 0.024 | 1.0                           | 1.1                          | 1.2                          |
| 15 | Haptoglobin                                               | ug/mL | 0.60  | 0.8                           | 0.7                          | 0.9                          |
| 16 | Immunoglobulin A (IgA)                                    | ug/mL | 0.52  | 1.0                           | 0.7                          | 0.7                          |
| 17 | Interferon gamma (IFN-gamma)                              | pg/mL | 23    | 0.8                           | 1.2                          | 1.5                          |
| 18 | Interferon gamma Induced Protein 10 (IP-10)               | pg/mL | 14    | 0.9                           | 1.3                          | 1.5                          |



|    |                                                       |       |        |       |       |       |
|----|-------------------------------------------------------|-------|--------|-------|-------|-------|
| 19 | Interleukin-1 alpha (IL-1 alpha)                      | pg/mL | 182    | 1.3   | 1.2   | 0.9   |
| 20 | Interleukin-1 beta (IL-1 beta)                        | ng/mL | 6.0    | <LOW> | <LOW> | <LOW> |
| 21 | Interleukin-2 (IL-2)                                  | pg/mL | 60     | 0.5   | 1.1   | 2.0   |
| 22 | Interleukin-3 (IL-3)                                  | pg/mL | 6.8    | 0.7   | 1.4   | 2.0   |
| 23 | Interleukin-4 (IL-4)                                  | pg/mL | 96     | 1.0   | 0.8   | 0.8   |
| 24 | Interleukin-5 (IL-5)                                  | ng/mL | 0.41   | <LOW> | <LOW> | <LOW> |
| 25 | Interleukin-6 (IL-6)                                  | pg/mL | 6.5    | 0.9   | 1.5   | 1.6   |
| 26 | Interleukin-7 (IL-7)                                  | ng/mL | 0.073  | 1.4   | 1.2   | 0.9   |
| 27 | Interleukin-10 (IL-10)                                | pg/mL | 224    | 0.8   | 1.3   | 1.6   |
| 28 | Interleukin-11 (IL-11)                                | pg/mL | 137    | 0.8   | 0.7   | 0.9   |
| 29 | Interleukin-12 Subunit p70 (IL-12p70)                 | ng/mL | 0.18   | 0.8   | 1.4   | 1.8   |
| 30 | Interleukin-17A (IL-17A)                              | ng/mL | 0.012  | 0.9   | 1.6   | 1.9   |
| 31 | Interleukin-18 (IL-18)                                | ng/mL | 4.3    | 0.7   | 2.0   | 2.7   |
| 32 | Leukemia Inhibitory Factor (LIF)                      | pg/mL | 707    | 1.4   | 0.9   | 0.6   |
| 33 | Lymphotactin                                          | pg/mL | 26     | 0.6   | 1.5   | 2.4   |
| 34 | Macrophage Colony-Stimulating Factor-1 (M-CSF-1)      | ng/mL | 0.0088 | 0.7   | 1.1   | 1.5   |
| 35 | Macrophage-Derived Chemokine (MDC)                    | pg/mL | 44     | 1.5   | 3.1   | 2.0   |
| 36 | Macrophage Inflammatory Protein-1alpha (MIP-1 alpha)  | ng/mL | 2.9    | 1.8   | 0.9   | 0.5   |
| 37 | Macrophage Inflammatory Protein-1 beta (MIP-1 beta)   | pg/mL | 50     | 0.8   | 1.1   | 1.4   |
| 38 | Macrophage Inflammatory Protein-1 gamma (MIP-1 gamma) | ng/mL | 0.046  | 1.1   | 1.0   | 0.9   |
| 39 | Macrophage Inflammatory Protein-2 (MIP-2)             | pg/mL | 5.9    | 0.7   | 1.2   | 1.7   |
| 40 | Macrophage Inflammatory Protein-3 beta (MIP-3 beta)   | ng/mL | 0.22   | 1.1   | 1.3   | 1.2   |
| 41 | Matrix Metalloproteinase-9 (MMP-9)                    | ng/mL | 0.39   | 0.5   | 0.9   | 1.9   |
| 42 | Monocyte Chemotactic Protein 1 (MCP-1)                | pg/mL | 5.0    | 0.8   | 2.0   | 2.4   |
| 43 | Monocyte Chemotactic Protein 3 (MCP-3)                | pg/mL | 8.1    | 1.0   | 1.8   | 1.9   |
| 44 | Monocyte Chemotactic Protein-5 (MCP-5)                | pg/mL | 3.9    | 0.9   | 2.3   | 2.5   |
| 45 | Myeloperoxidase (MPO)                                 | ng/mL | 0.60   | 1.1   | 0.9   | 0.9   |
| 46 | Myoglobin                                             | ng/mL | 0.34   | 1.2   | 1.1   | 0.9   |
| 47 | Oncostatin-M (OSM)                                    | ng/mL | 0.15   | 0.7   | 0.9   | 1.2   |

|    |                                                               |       |       |     |     |     |
|----|---------------------------------------------------------------|-------|-------|-----|-----|-----|
| 48 | Serum Amyloid P-Component (SAP)                               | ug/mL | 0.091 | 1.3 | 1.4 | 1.1 |
| 49 | Serum Glutamic Oxaloacetic Transaminase (SGOT)                | ug/mL | 53    | 0.9 | 1.3 | 1.6 |
| 50 | Stem Cell Factor (SCF)                                        | pg/mL | 130   | 0.8 | 1.0 | 1.1 |
| 51 | T-Cell-Specific Protein RANTES (RANTES)                       | pg/mL | 0.076 | 1.3 | 3.0 | 2.3 |
| 52 | Thrombopoietin                                                | ng/mL | 22    | 1.2 | 0.1 | 0.1 |
| 53 | Tissue Factor (TF)                                            | ng/mL | 3.6   | 1.1 | 0.8 | 0.7 |
| 54 | Tissue Inhibitor of Metalloproteinases 1 Mouse (TIMP-1 Mouse) | ng/mL | 0.057 | 1.6 | 1.3 | 0.8 |
| 55 | Tumor Necrosis Factor alpha (TNF-alpha)                       | ng/mL | 0.052 | 1.0 | 1.0 | 0.9 |
| 56 | Vascular Cell Adhesion Molecule-1 (VCAM-1)                    | ng/mL | 0.14  | 1.0 | 1.2 | 1.2 |
| 57 | Vascular Endothelial Growth Factor A (VEGF-A)                 | pg/mL | 45    | 1.0 | 0.6 | 0.6 |
| 58 | von Willebrand factor (vWF)                                   | ng/mL | 0.76  | 0.8 | 1.5 | 1.8 |

(LDD) the least detectable dose

<LOW> reflect samples not measurable on the standard curve.
